# Supplementary material for: Knowledge and Attitudes toward Human Papillomavirus and Vaccination: A Survey among Nursing Students in Saudi Arabia
Source: MDPI journal article supplement (doi:10.3390/healthcare11121766), 2023-06-15
Supplement: s1 [file s1]

### List of supplementary tables

#### Supplementary Table S1: Total population and study sample size.

| College | No.student | Formula |
|---------|------------|---------|
| Nursing | 1014       | 307     |

#### Supplementary Table S2: sampling calculation (95% Confidence, 5% error)

| Year                 | Total population | Calculated population |
|----------------------|------------------|-----------------------|
| 1 <sup>st</sup> year | 517              | 156                   |
| 2 <sup>nd</sup> year | 250              | 77                    |
| 3 <sup>rd</sup> year | 129              | 39                    |
| 4 <sup>th</sup> year | 118              | 35                    |
